# Supplementary material for: Tissue-specific and repeat length-dependent somatic instability of the X-linked dystonia parkinsonism-associated CCCTCT repeat
Source: PubMed Central journal article supplement (PMC8994295; doi:10.1186/s40478-022-01349-0), 2022-04-08
Supplement: 40478_2022_1349_MOESM2_ESM.pdf [file 40478_2022_1349_MOESM2_ESM.pdf]

Tissue-specific and repeat length-dependent somatic instability of the X-linked dystonia parkinsonism-associated CCCTCT repeat

Lindsey N. Campion<sup>1,2#</sup>, Alan Mejia Maza<sup>1,3#</sup>, Rachita Yadav<sup>1,2,3,4</sup>, Ellen B. Penney<sup>1,2</sup>, Micaela G. Murcar<sup>1,2</sup>, Kevin Correia<sup>3</sup>, Tammy Gillis<sup>3</sup>, Cara Fernandez-Cerado<sup>5</sup>, M. Salvie Velasco-Andrada<sup>5</sup>, G. Paul Legarda<sup>5</sup>, Niecy G. Ganza-Bautista<sup>5</sup>, J. Benedict B. Lagarde<sup>5</sup>, Patrick J. Acuña<sup>1,2,5</sup>, Trisha Multhaupt-Buell<sup>1,2</sup>, Gabrielle Aldykiewicz<sup>1,2</sup>, Melanie L. Supnet<sup>1,2</sup>, Jan K. De Guzman<sup>5,6</sup>, Criscely Go<sup>6</sup>, Nutan Sharma<sup>1,2</sup>, Edwin L. Munoz<sup>7</sup>, Mark C. Ang<sup>7</sup>, Cid Czarina E. Diesta<sup>8</sup>, D. Cristopher Bragg<sup>1,2</sup>, Laurie J. Ozelius<sup>1,2\*</sup>, Vanessa C. Wheeler<sup>1,3\*</sup>

#Equal contribution

\*Corresponding authors

<sup>1</sup>Department of Neurology, Massachusetts General Hospital and Harvard Medical School, Boston, MA, USA

<sup>2</sup>Department of Neurology, The Collaborative Center for X-linked Dystonia-Parkinsonism, Massachusetts General Hospital, Charlestown, MA, USA

<sup>3</sup>Center for Genomic Medicine, Massachusetts General Hospital, Boston, MA, USA

<sup>4</sup>Program in Medical and Population Genetics, Broad Institute of MIT and Harvard, Cambridge, MA

<sup>5</sup>Sunshine Care Foundation, Roxas City, Capiz, Philippines

<sup>6</sup>Department of Neurology, Jose R. Reyes Memorial Medical Center, Metro Manila, Philippines

<sup>7</sup>Department of Pathology, College of Medicine, University of the Philippines, Manila, Philippines

<sup>8</sup>Department of Neurosciences, Makati Medical Center, Makati, Philippines

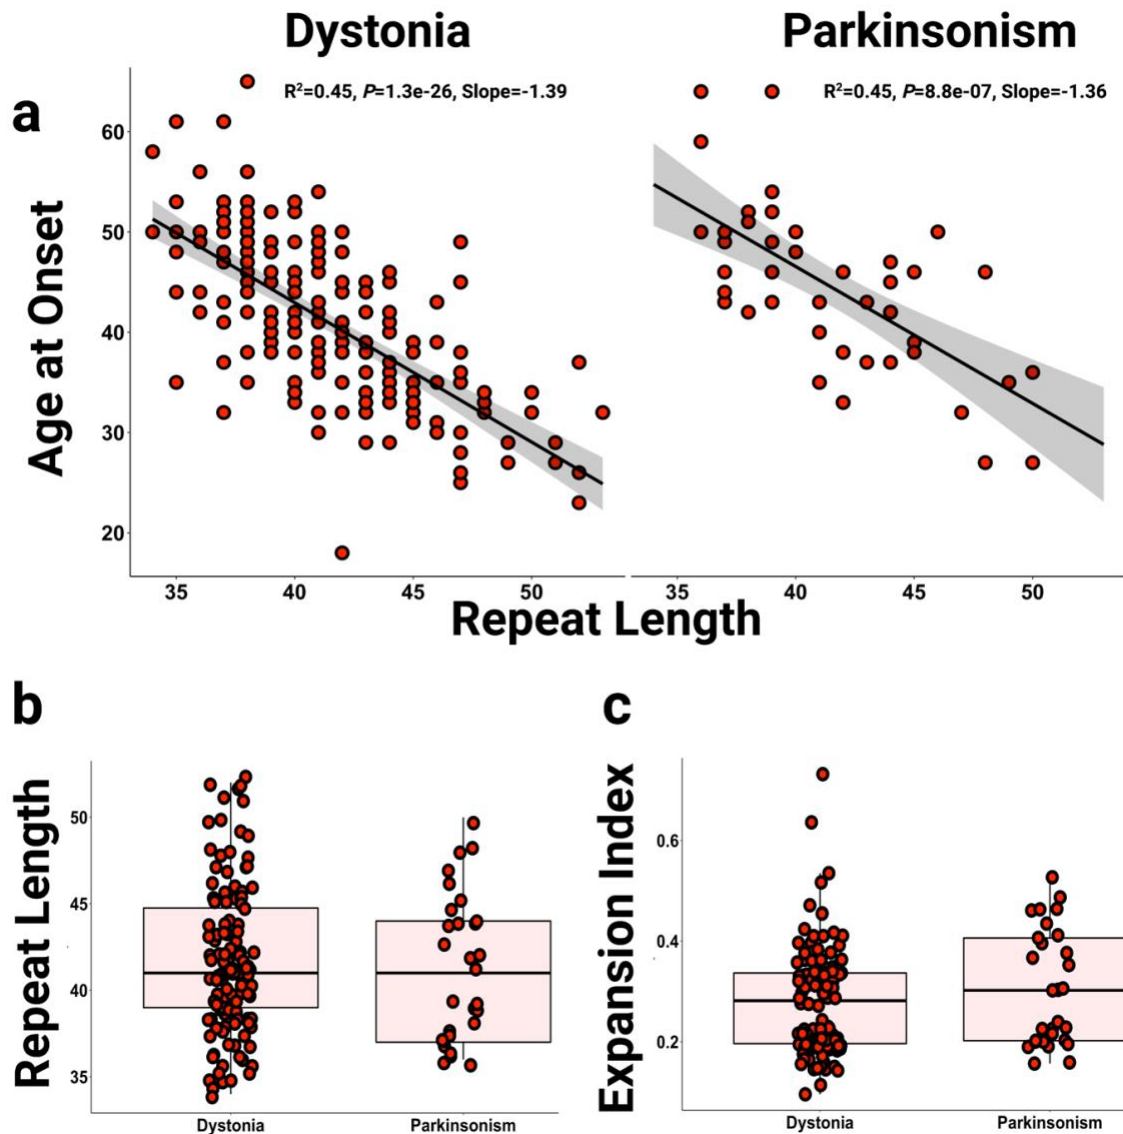

**Fig S1. Repeat-related outcomes in individuals exhibiting dystonia or Parkinson's symptoms at onset.** **a** Inverse correlations between CCCTCT repeat length (in blood) with AAO in individuals expressing dystonia (n=194) or parkinsonism (n=43) at onset. Grey shaded areas show 95% confidence interval. **b** Distribution of repeat length (in blood) in individuals expressing dystonia (n=194) or parkinsonism (n=43). **c** Distribution of expansion indices (in blood) in individuals expressing dystonia (n=122) or parkinsonism (n=29). Box-whisker plots show median  $\pm$  interquartile range (IQR) and red dots show values in individual patient samples. **b-c** showed no statistical differences between groups.

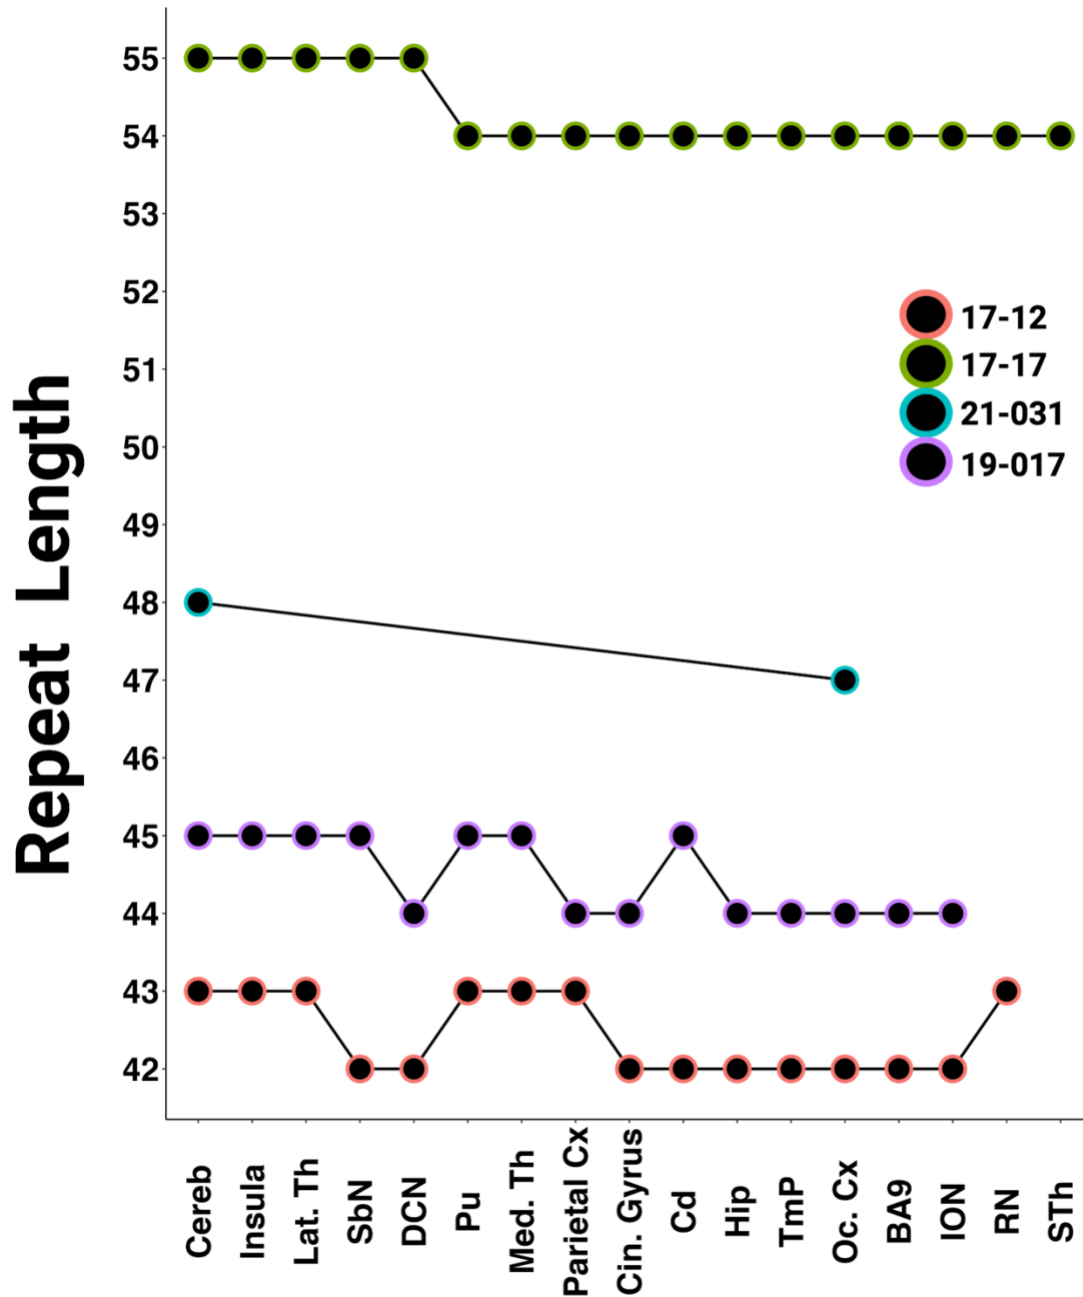

**Fig S2: Modal repeat length variation in brain regions.** Of the 23 postmortem samples in which multiple brain regions were analyzed, 4 (17-012, 17-17, 19-017 and 21-031) exhibited variation by one repeat unit in the modal repeat length.

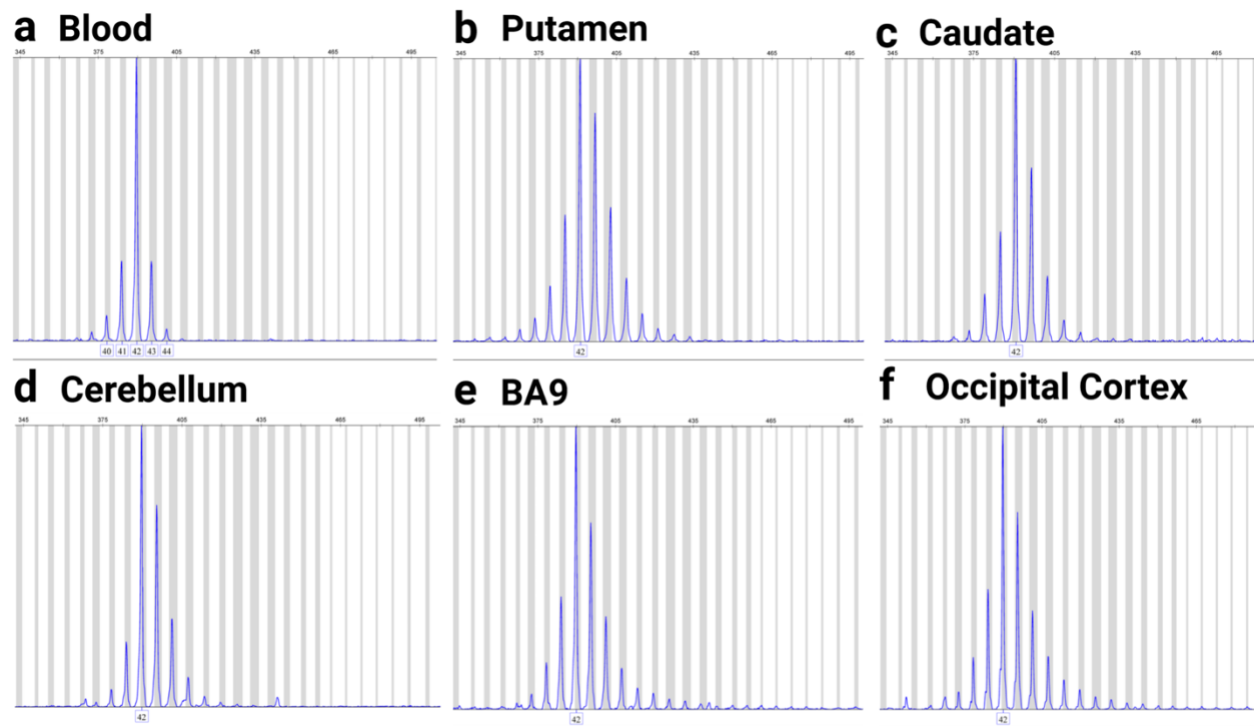

**Fig S3: Examples of XDP CCCTCT repeat GeneMapper traces from different tissues. a-f**

GeneMapper traces of blood and different brain tissues from individual 17-19. “x” axis shows base pair size and peak height respectively. Indicated on the “x”-axes are assigned repeat lengths based on standard repeat controls.

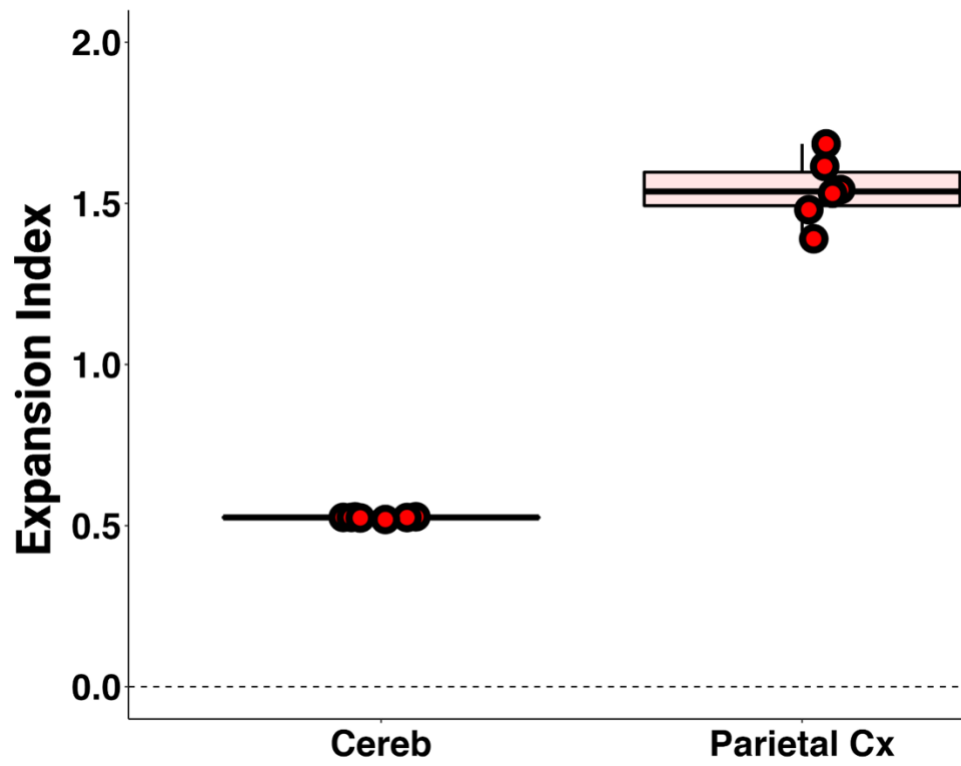

**Fig. S4: Technical variability in expansion index values.** Expansion indices were derived from 5 independent XDP CCCTCT repeat PCRs from samples 19-022 (Cereb) and 18-001 (Parietal Cx).

**a Cerebellum**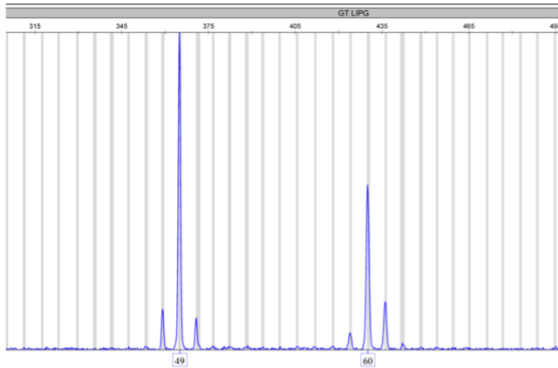**d BA9**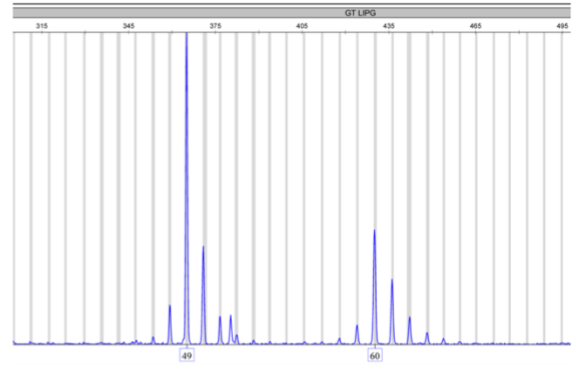**b Cd**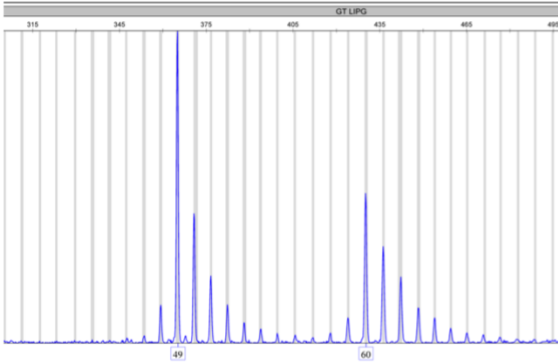**e Tmp**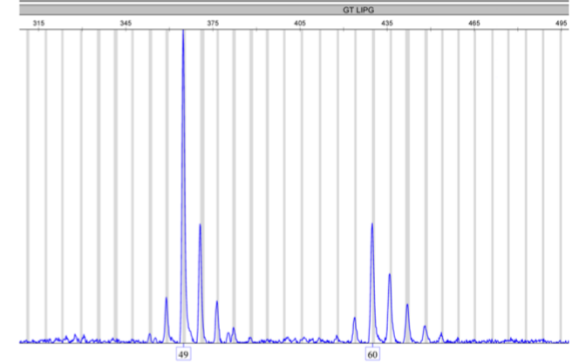**c Hip**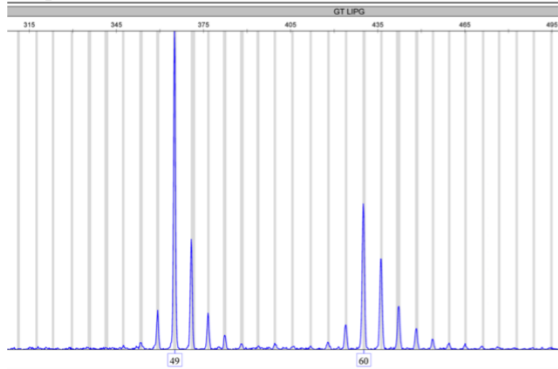**f Oc. Cx**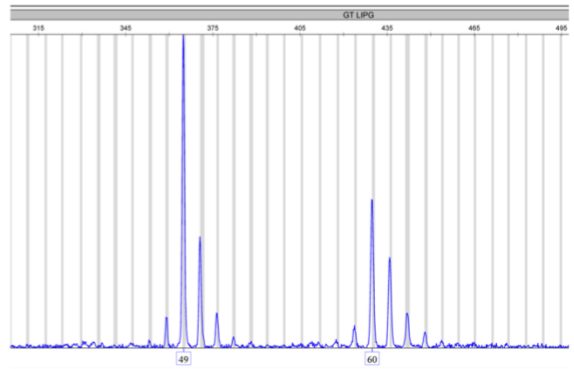

**Fig S5: Examples of *LIPG* CCCTCT GeneMapper traces from different tissues.**

**a-f** GeneMapper traces of different brain tissues from individual 17-19. “x” axis shows base pair size and peak height respectively. Indicated on the “x”-axes are assigned repeat lengths based on base pair size.
